# Supplementary material for: Recyclable heterogeneous copper oxide on alumina catalyzed coupling of phenols and alcohols with aryl halides under ligand-free conditions
Source: Royal Society of Chemistry journal article supplement (doi:10.1039/c1ob05411b), 2011-01-01

## **Recyclable Heterogeneous Copper Oxide on Alumina Catalyzed Coupling of Phenols and Alcohols with Aryl halides under Ligand Free Conditions**

Kokkerala Swapna,<sup>a</sup> Sabbavarapu Narayana Murthy,<sup>a</sup> Mocharla Tarani Jyothi<sup>a</sup> and Yadavalli Venkata Durga Nageswar\*<sup>a</sup>

<sup>a</sup> *Organic Chemistry Division-I, Indian Institute of Chemical Technology, Hyderabad 500607, India. Tel: +91-40-27191654, Fax: +91-40-27160512.*

*E-mail: dryvdnageswar@gmail.com*

## Contents

|                                                                                                                                          |          |
|------------------------------------------------------------------------------------------------------------------------------------------|----------|
| <b>Representative Experimental Procedure for the Synthesis of Diaryl Ethers by Using Heterogeneous CuO on alumina as a Catalyst.....</b> | <b>3</b> |
| <b>Copies of <math>^1\text{H}</math> NMR and <math>^{13}\text{C}</math> NMR of Compounds.....</b>                                        | <b>4</b> |

**Representative Experimental Procedure for the Synthesis of Diaryl Ether by Using CuO on alumina as a Catalyst:** To a stirred solution of iodo benzene (**1a**) (1.0 mmol) and phenol (**2a**) (1.0 mmol) in dry DMSO (2.0 ml) were added CuO on alumina catalyst (13%, 120 mg) and KOH (2.0 equiv) and the reaction mixture was heated at 100 °C under nitrogen atmosphere for 18 h, The progress of the reaction was monitored by TLC. After completion of the reaction, the reaction mixture was extracted with ethyl acetate (3x10 ml). The combined organic layers were dried with anhydrous Na<sub>2</sub>SO<sub>4</sub>. The solvent was evaporated under vacuum to give the crude product, which was purified by column chromatography with hexane as eluent to yield the expected product **3a** (166 mg, 98%) as yellowish oil. The purity of the product was confirmed by <sup>1</sup>H, <sup>13</sup>C and Mass, IR spectroscopy.

Supplementary Material (ESI) for Organic & Biomolecular Chemistry

This journal is (c) The Royal Society of Chemistry 2011

## **Copies of $^1\text{H}$ NMR and $^{13}\text{C}$ NMR of Compounds**

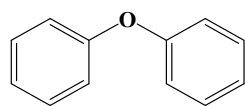

**(entry 1, Table 2)**

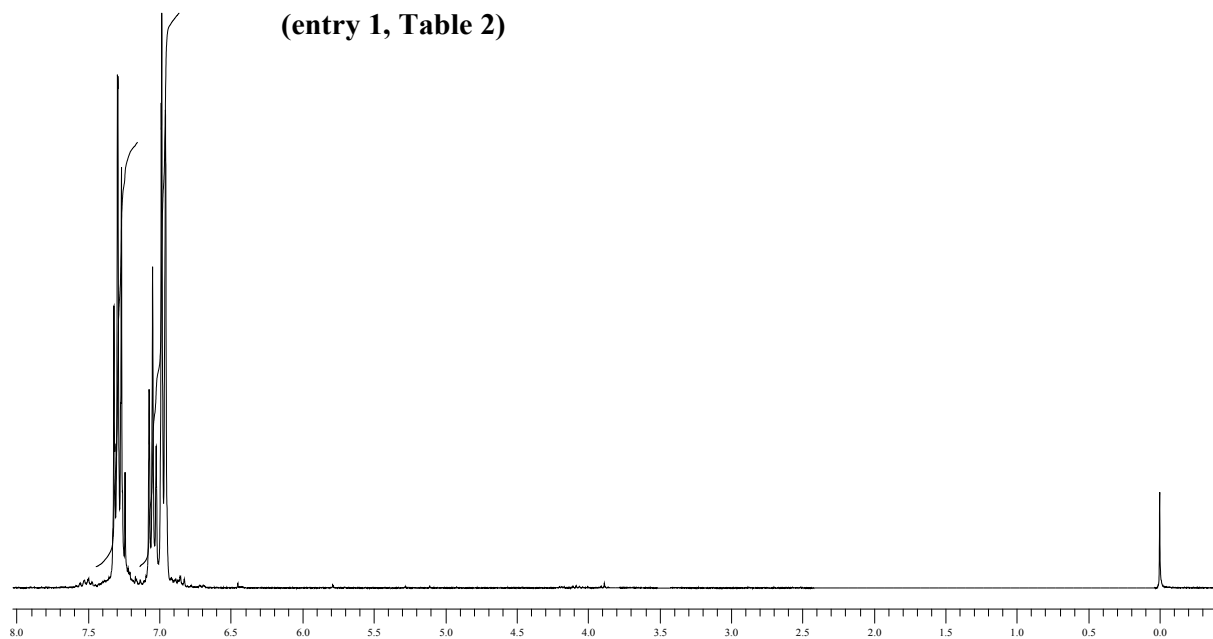

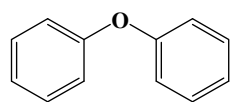

(entry 1, Table 2)

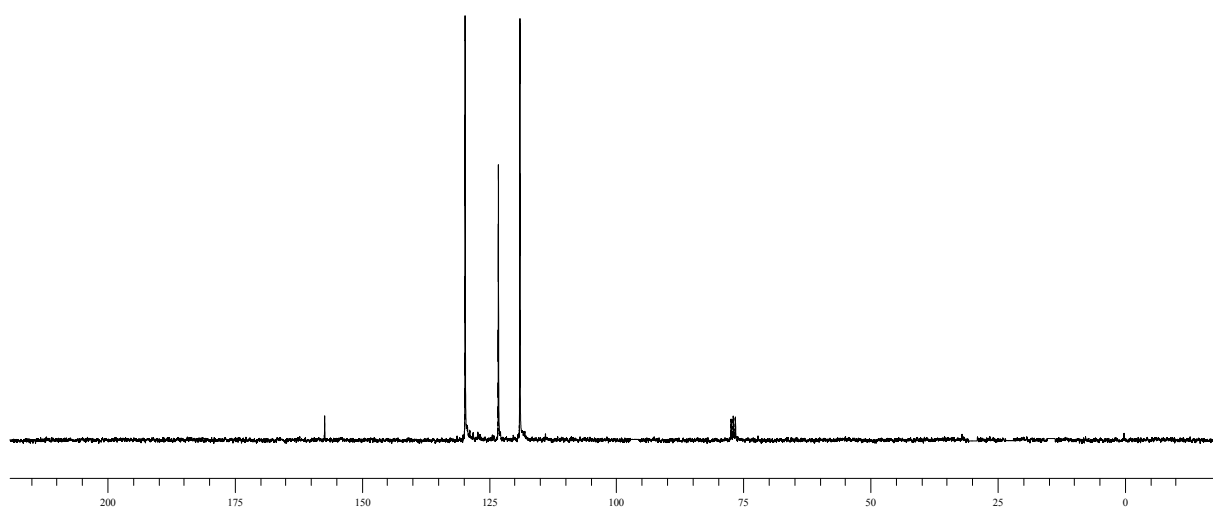

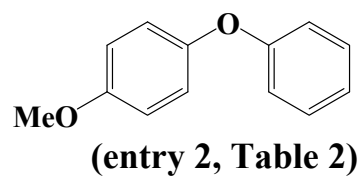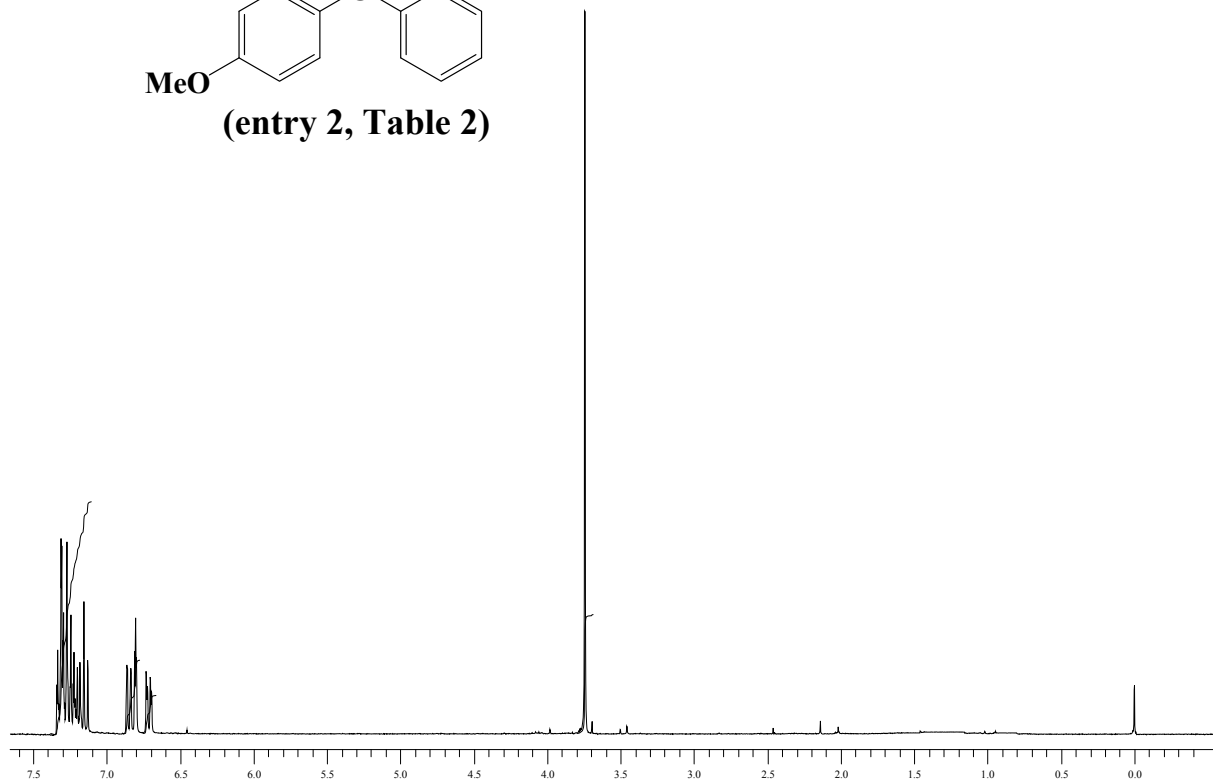

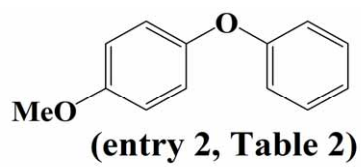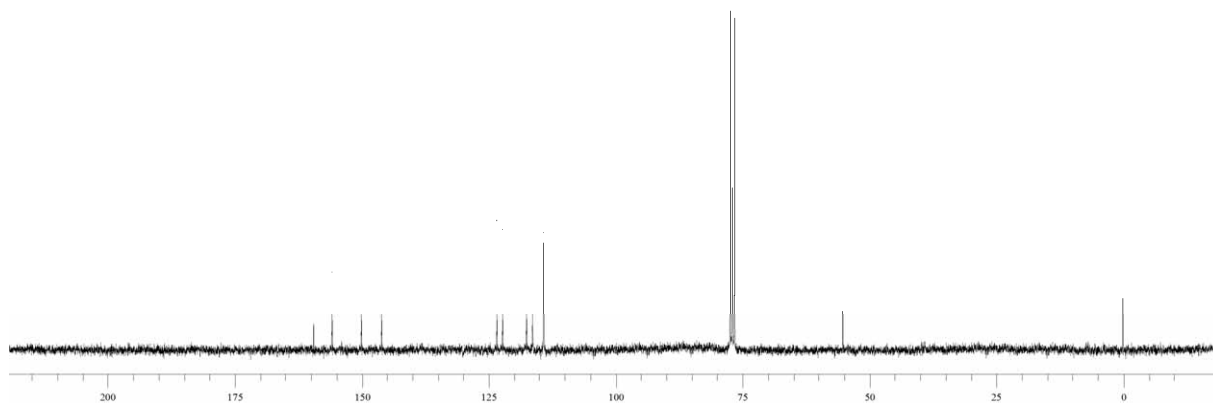



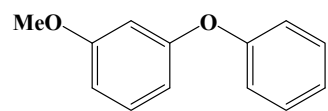

(entry 3, Table 2)

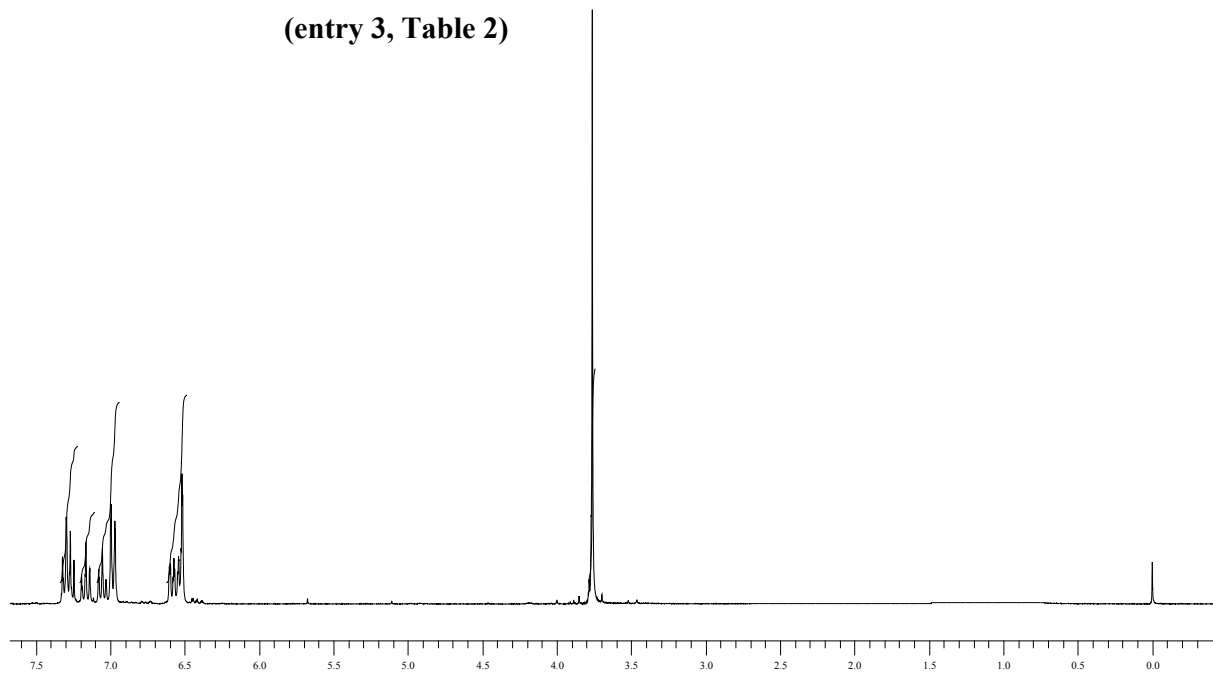

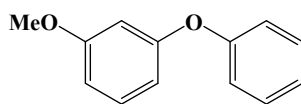

(entry 3, Table 2)

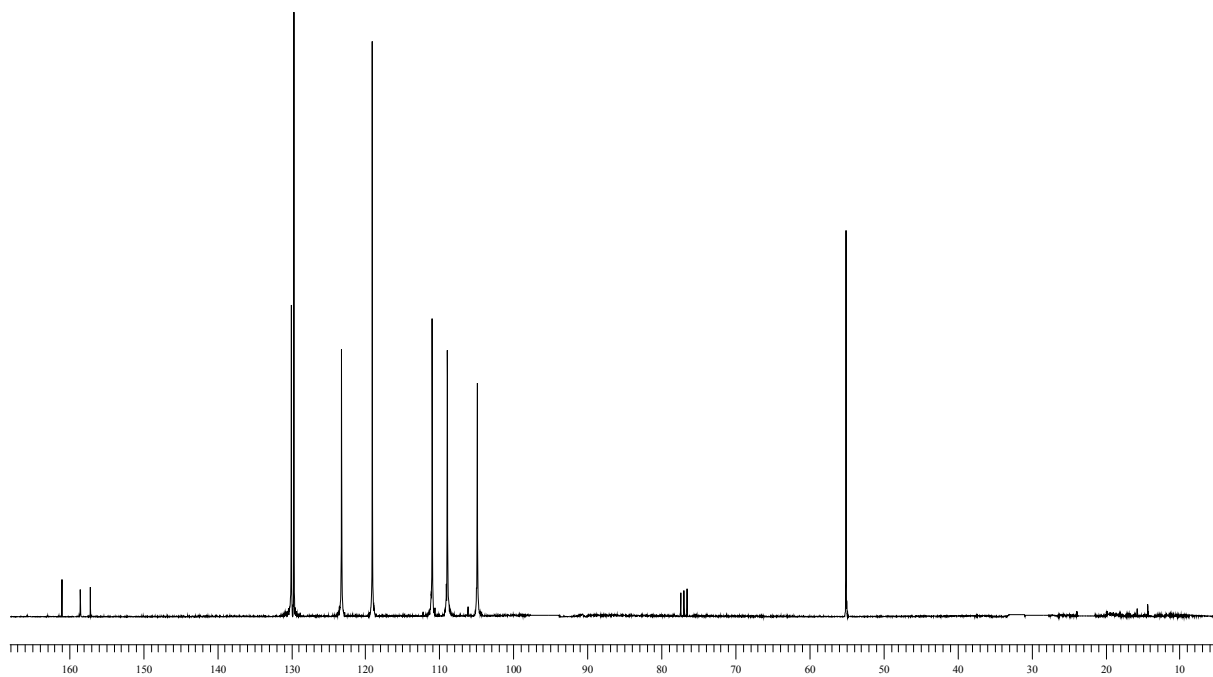

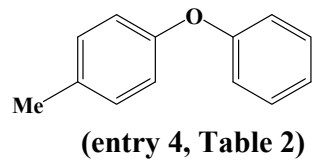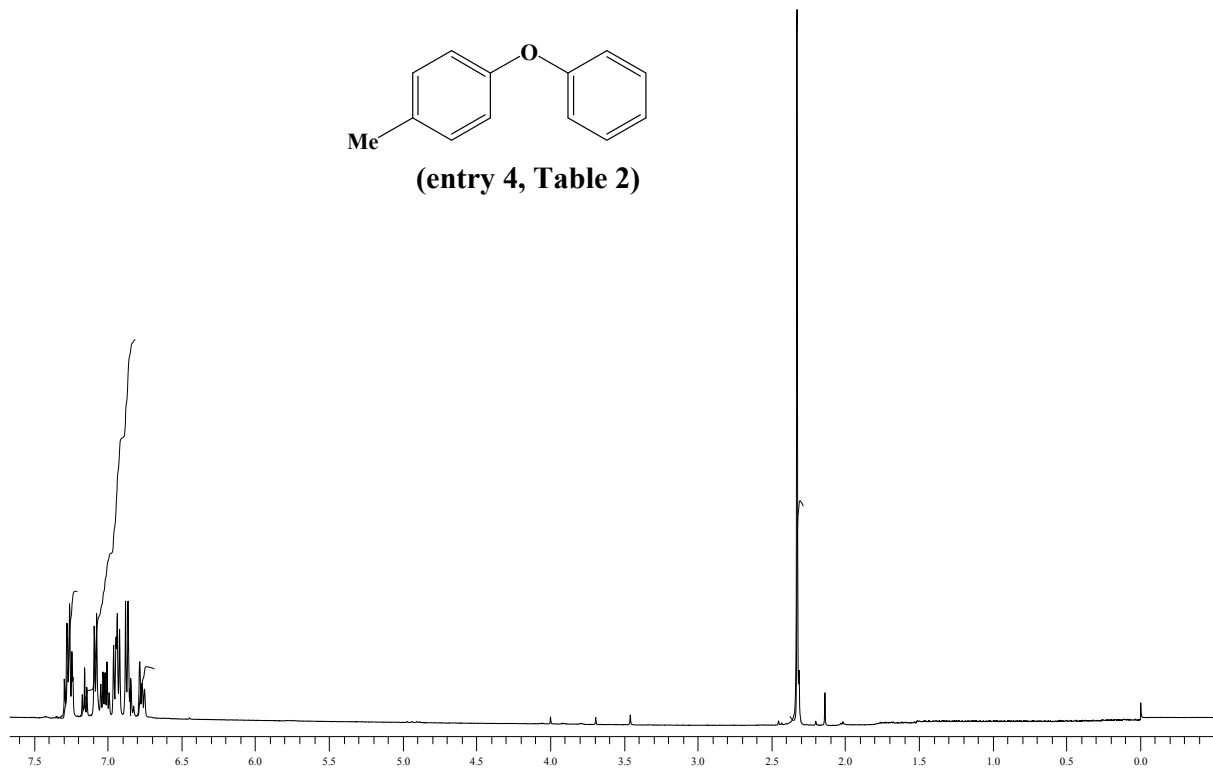

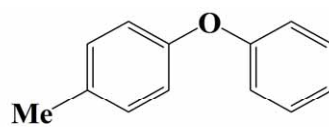

**(entry 4, Table 2)**

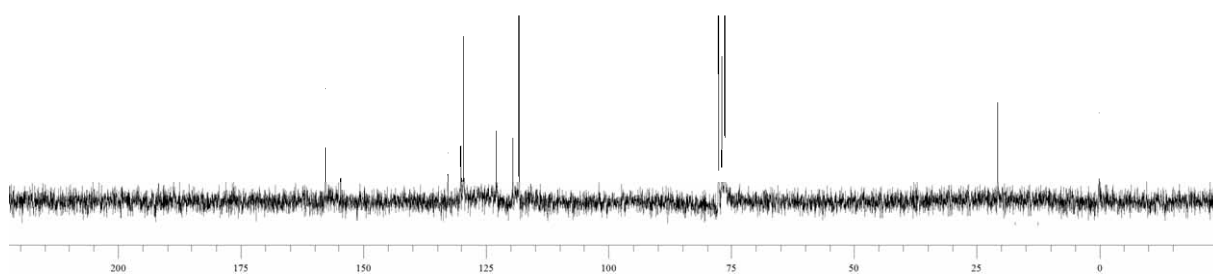

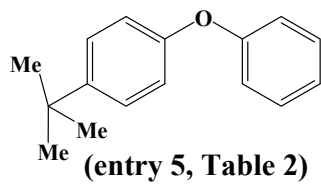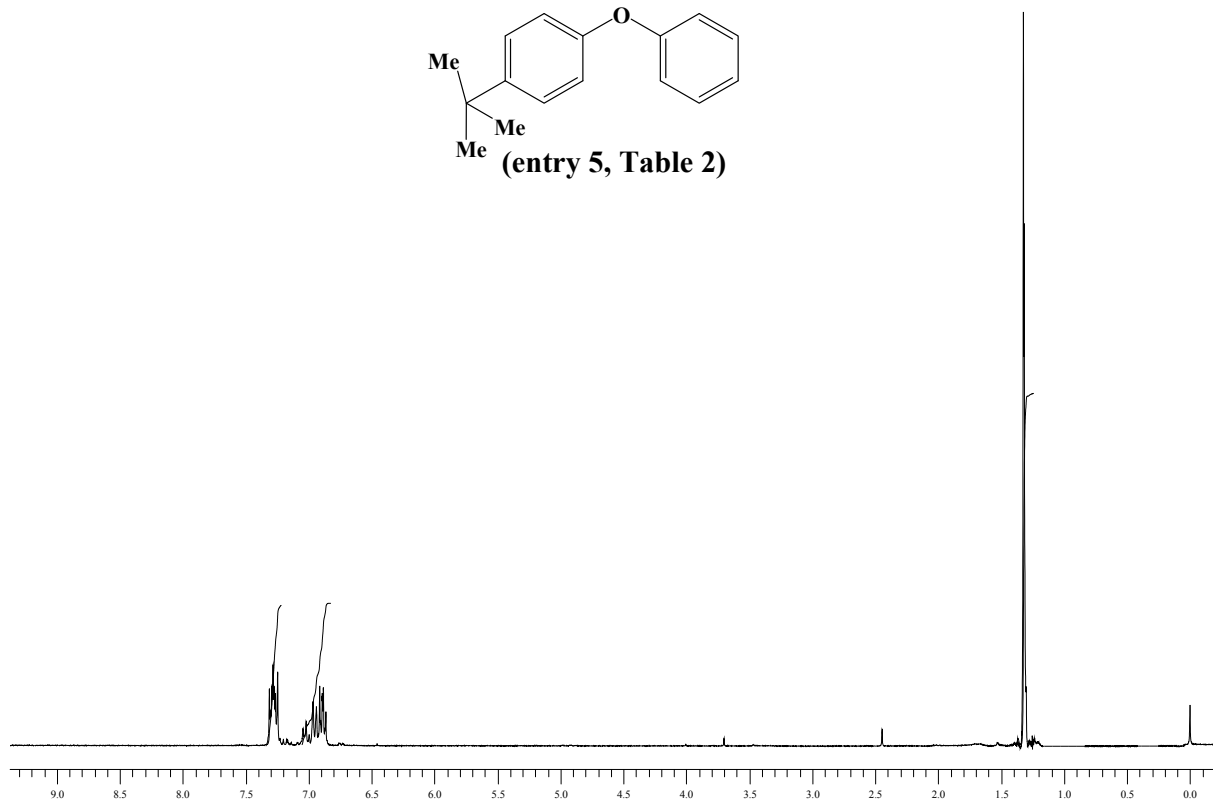

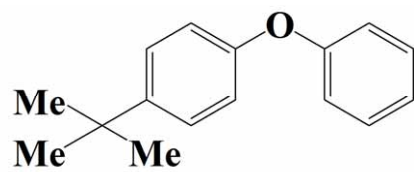

(entry 5, Table 2)

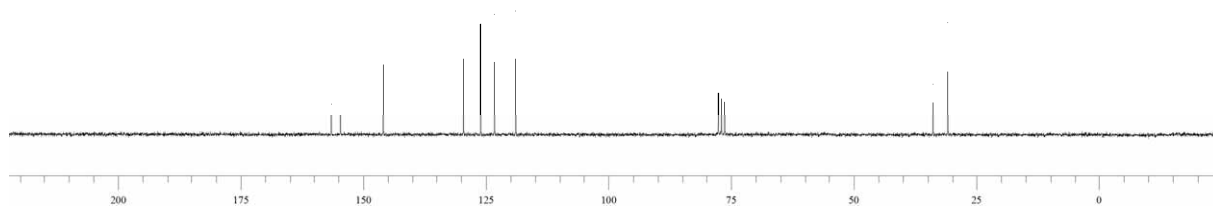

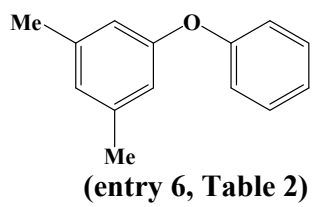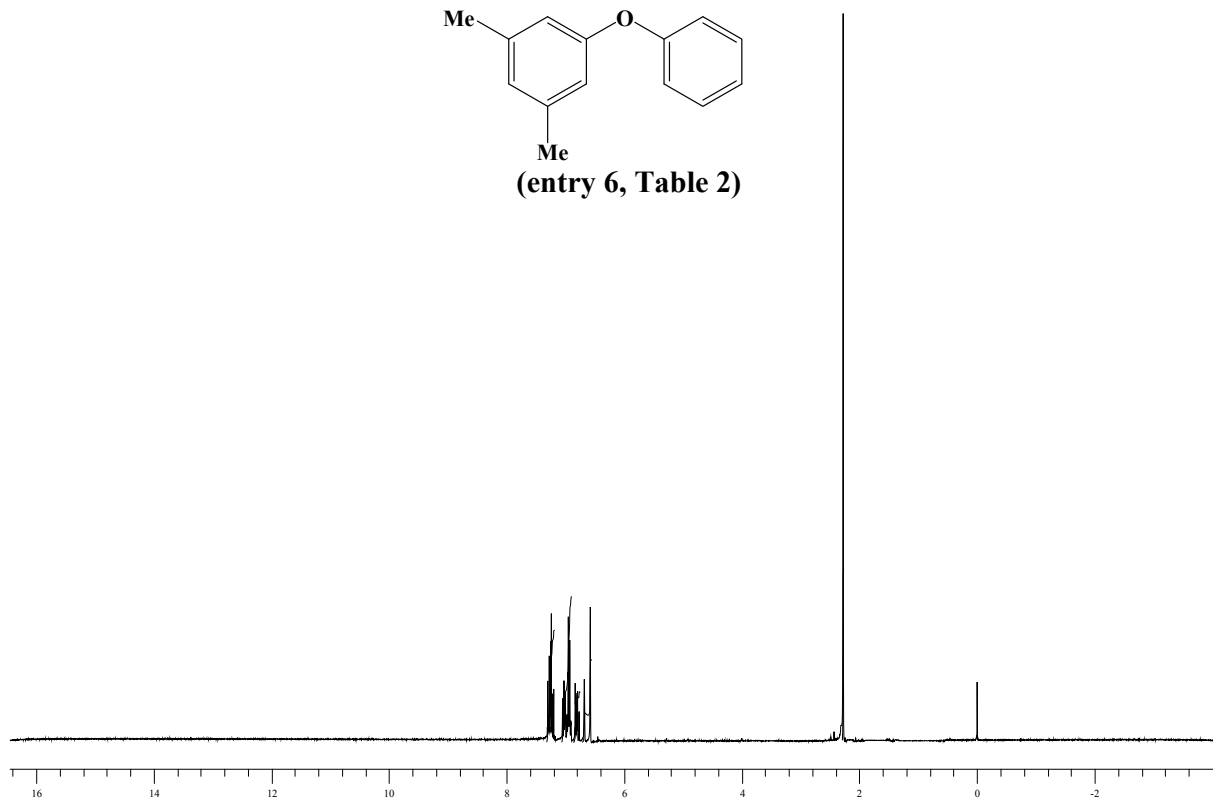

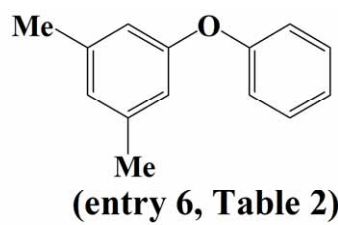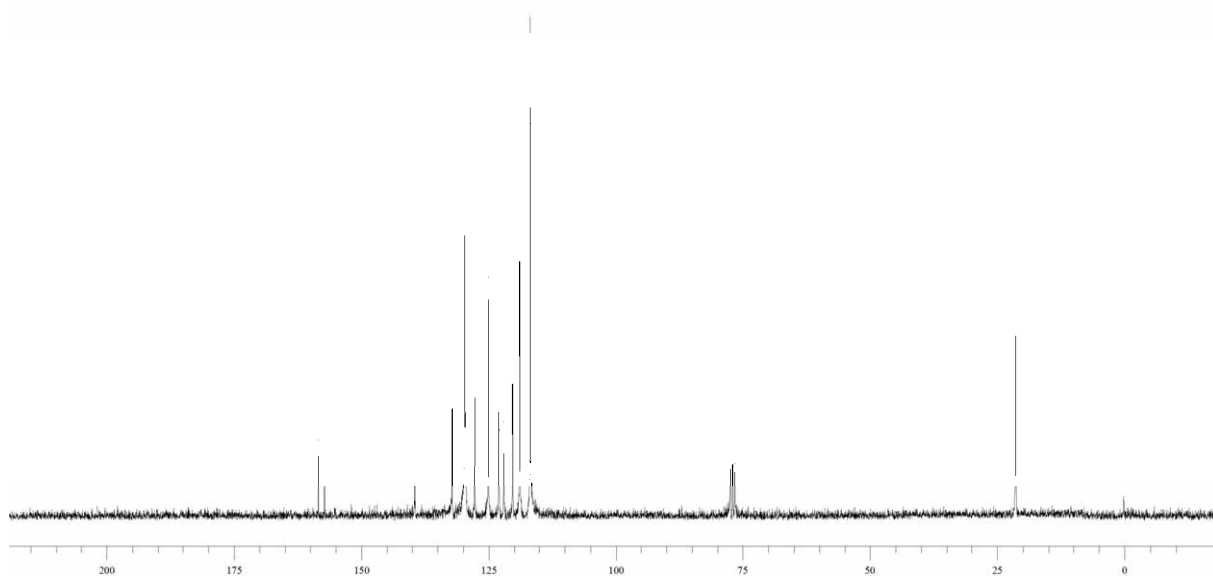



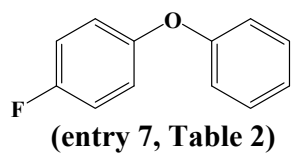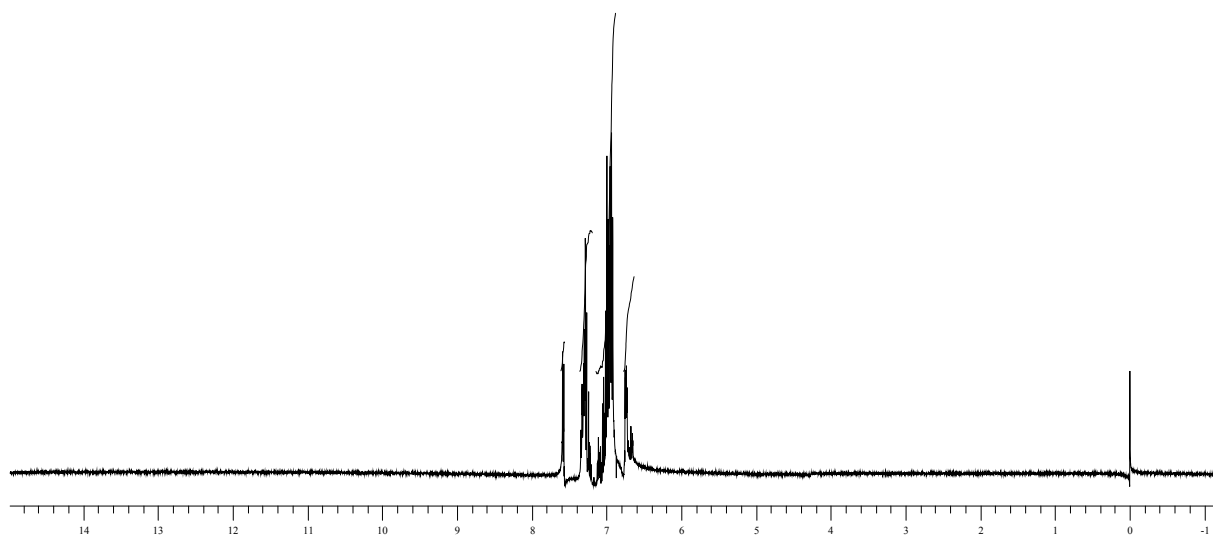

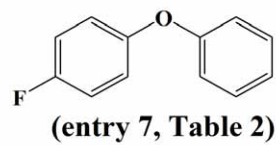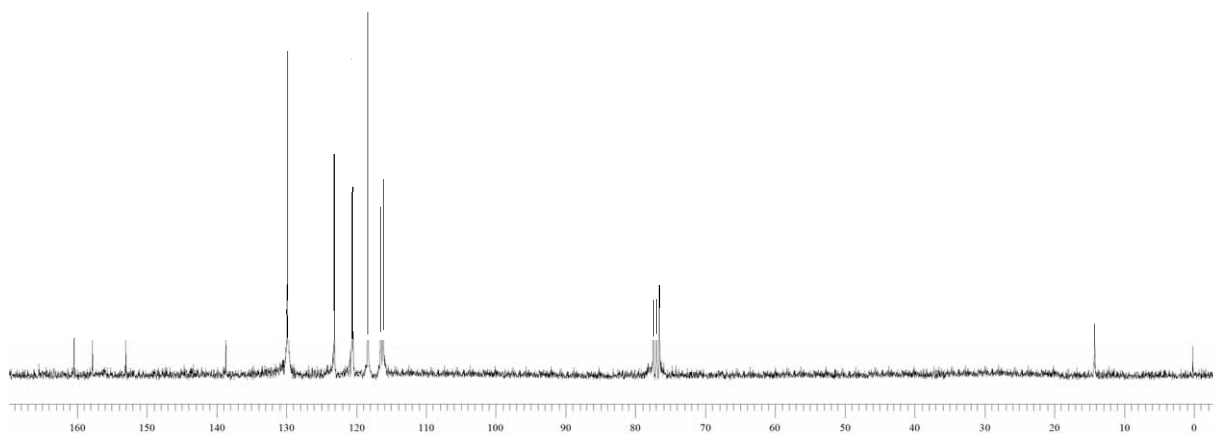

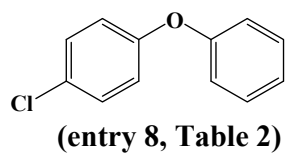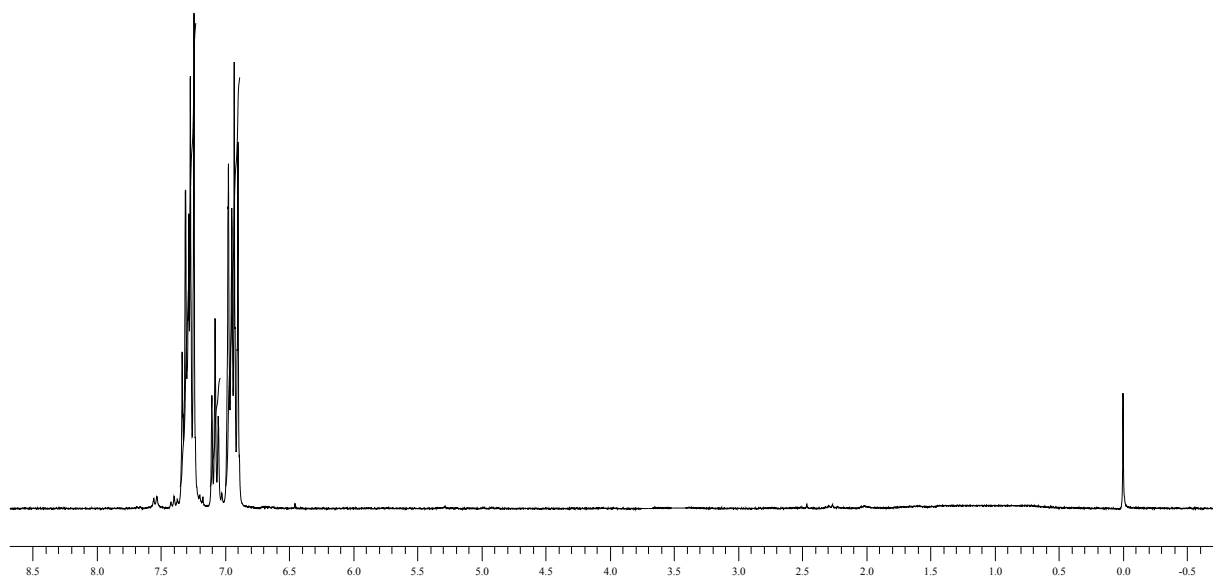

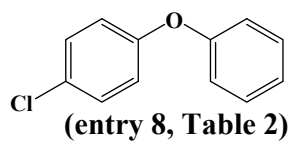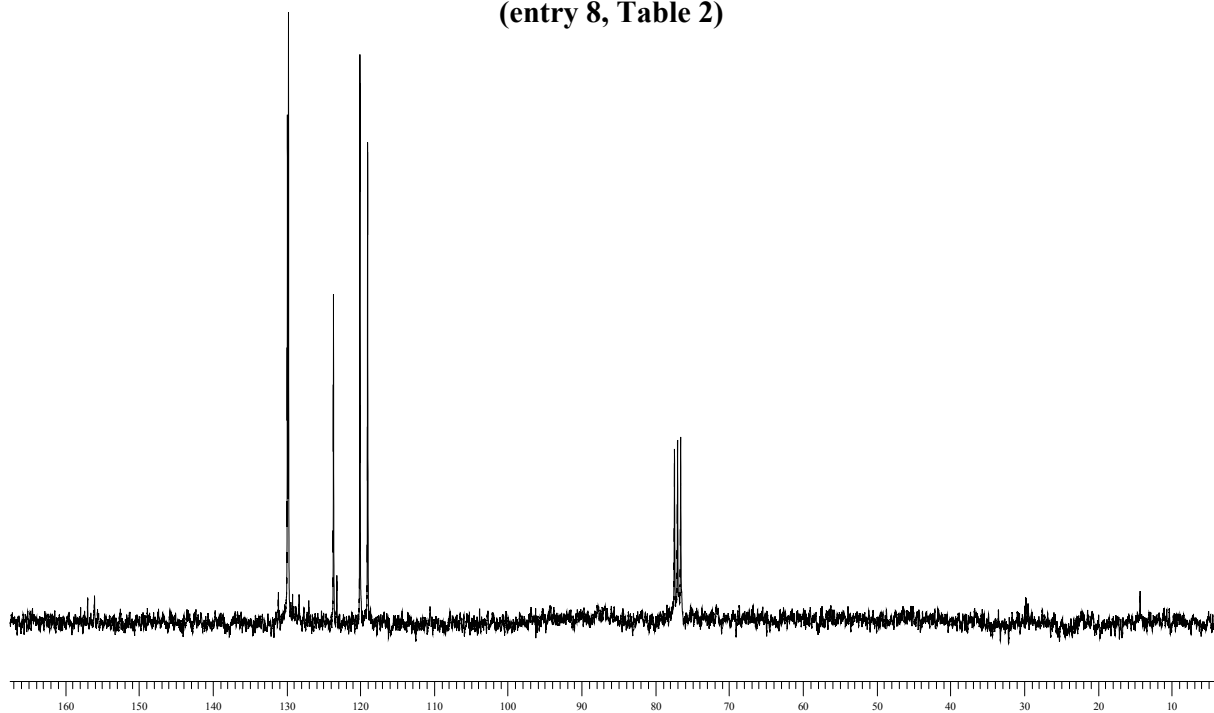

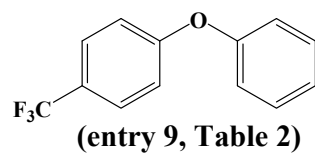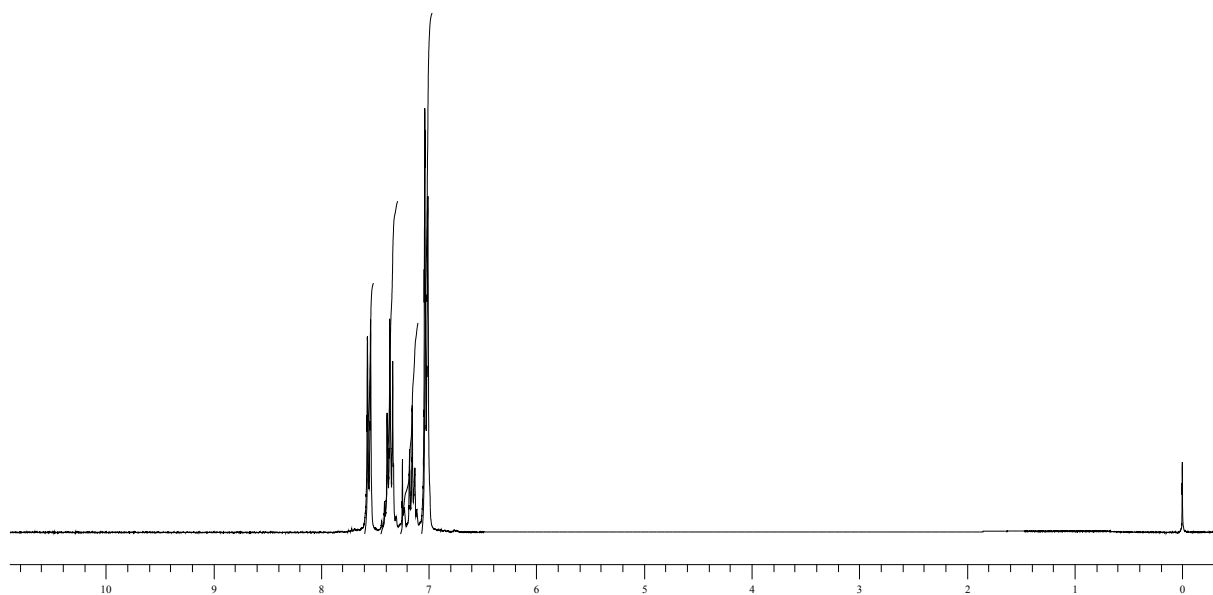

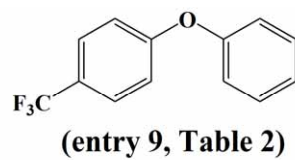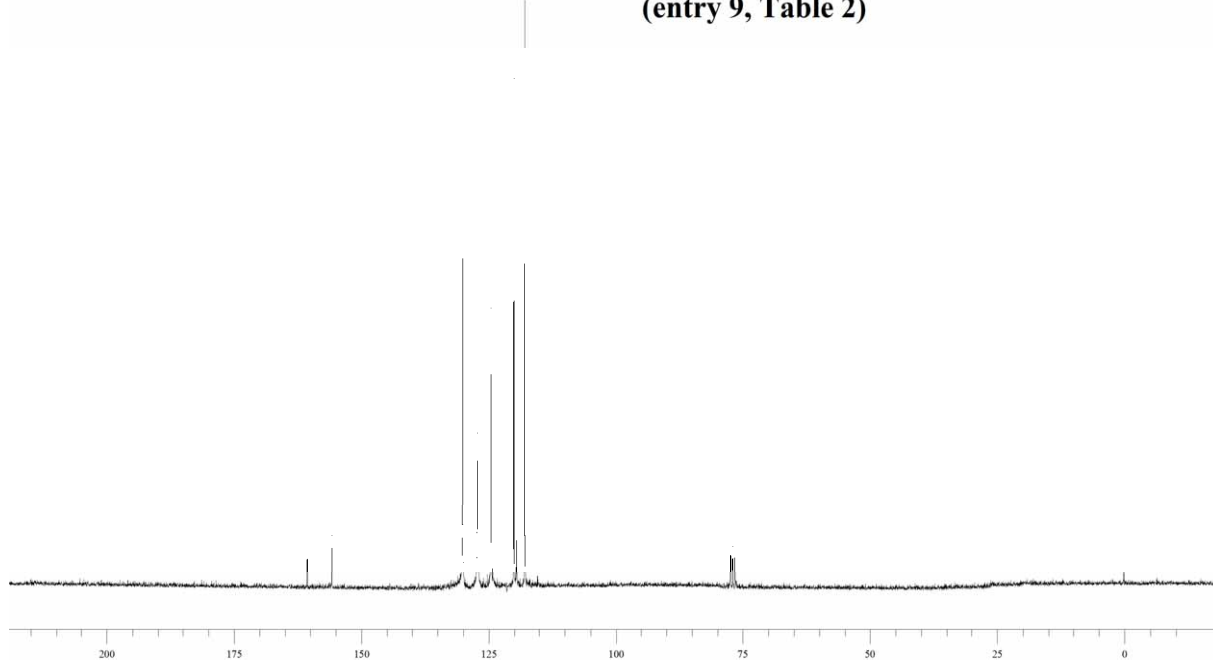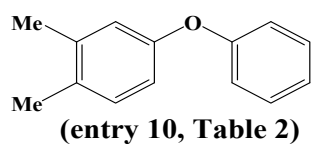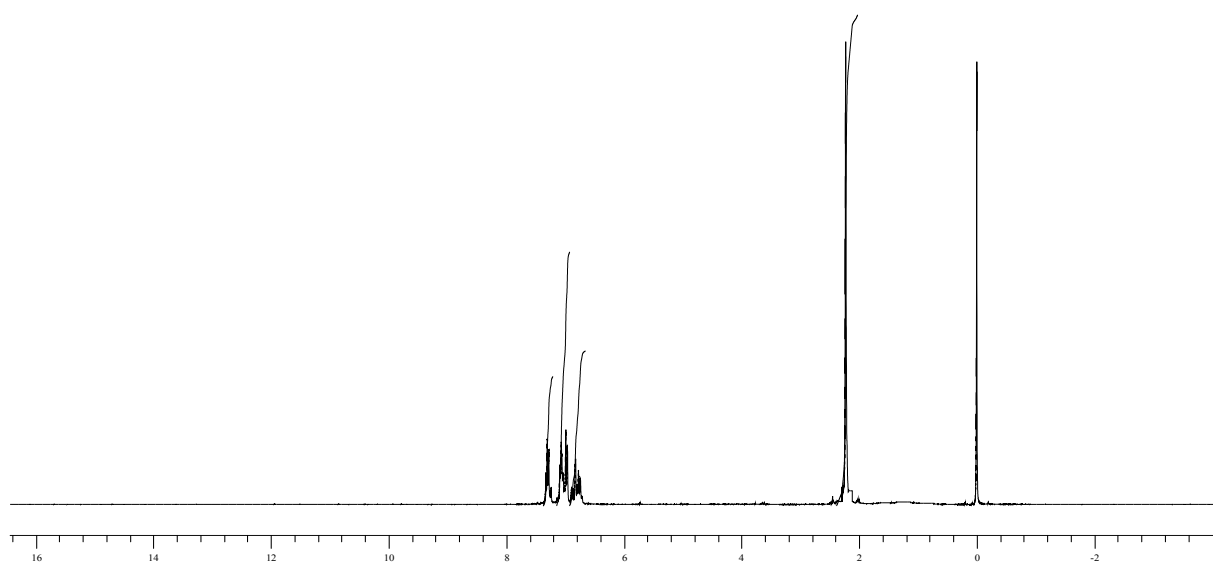

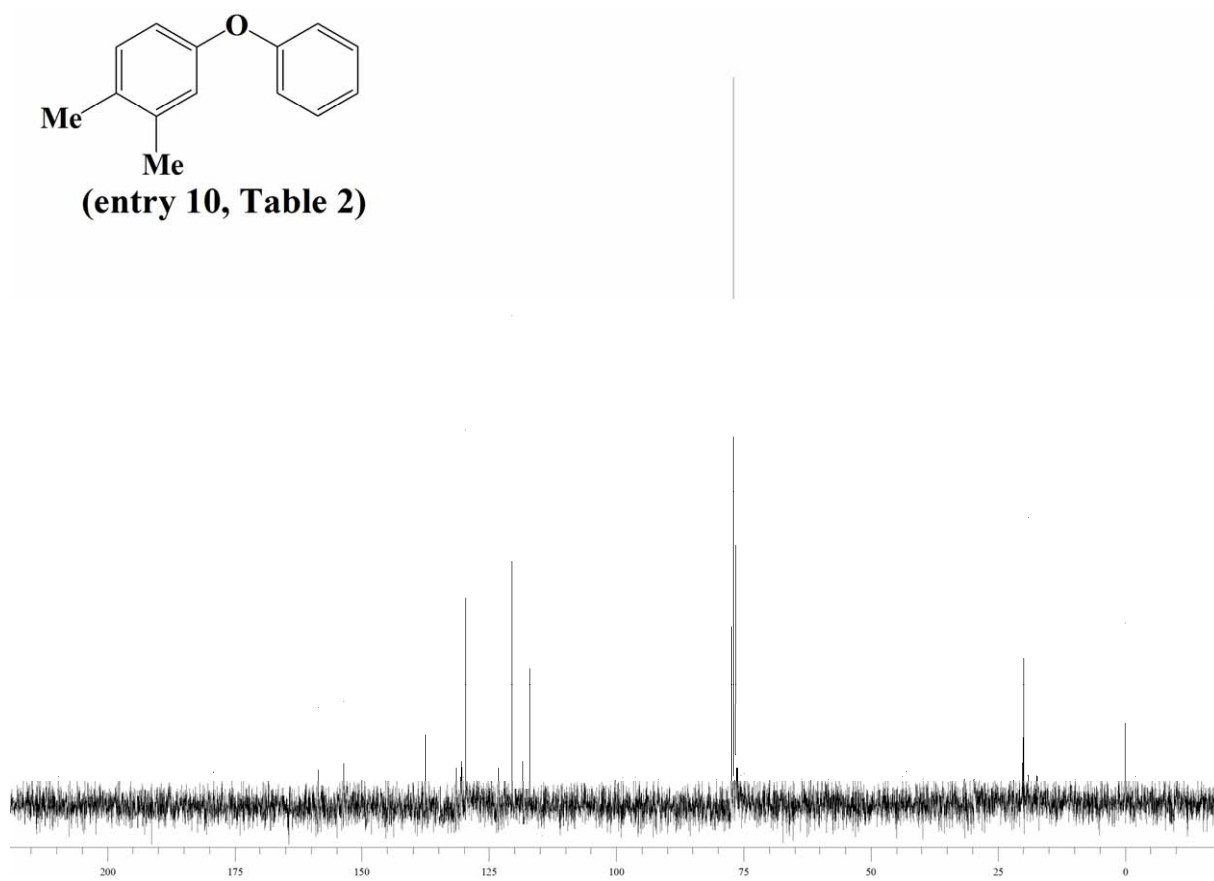

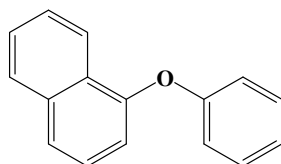

(entry 11, Table 2)

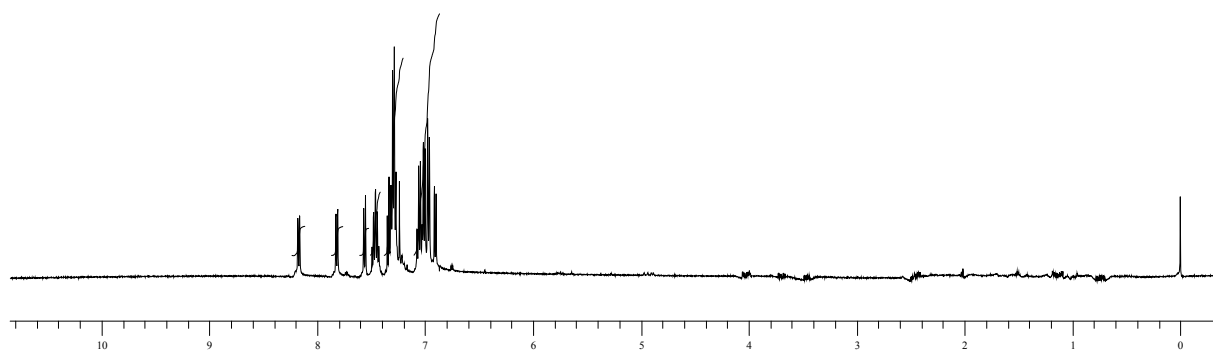



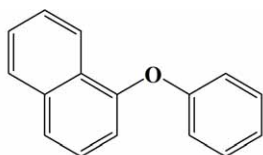

**(entry 11, Table 2)**

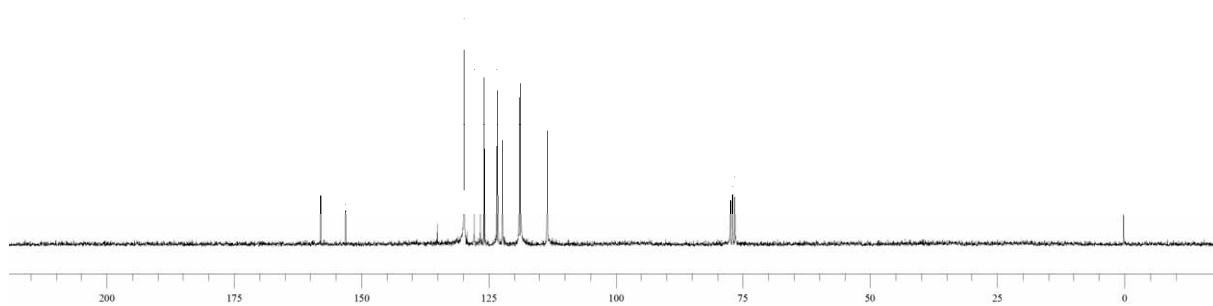

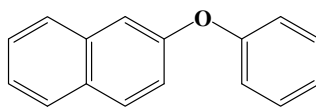

(entry 12, Table 2)

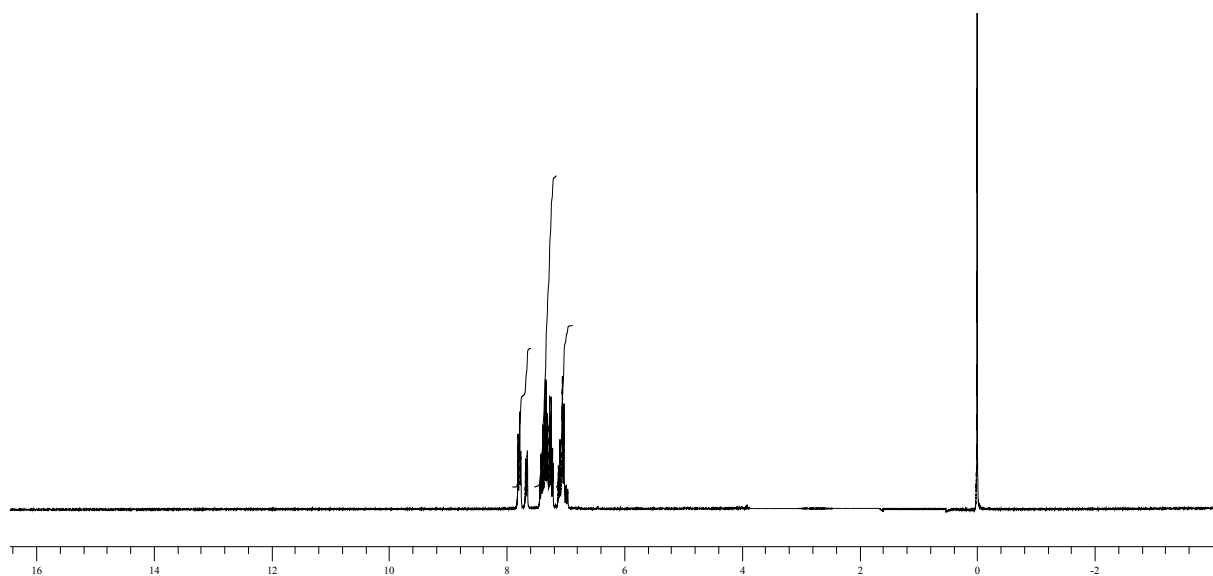

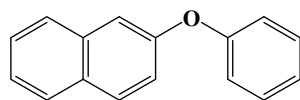

**(entry 12, Table 2)**

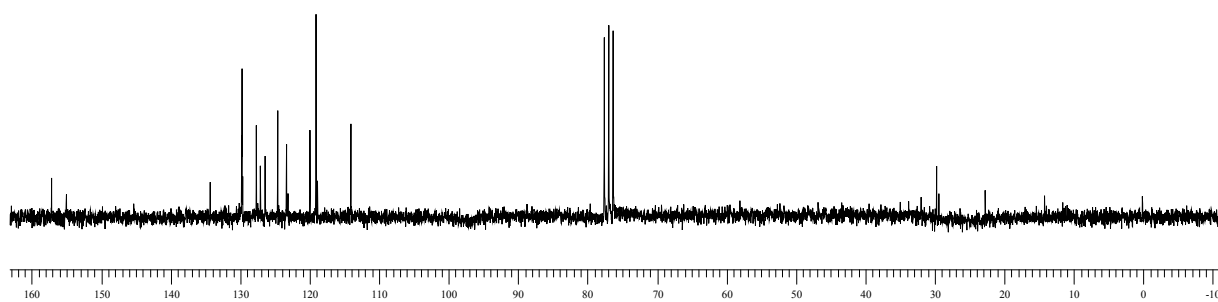

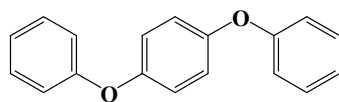

(entry 13, Table 2)

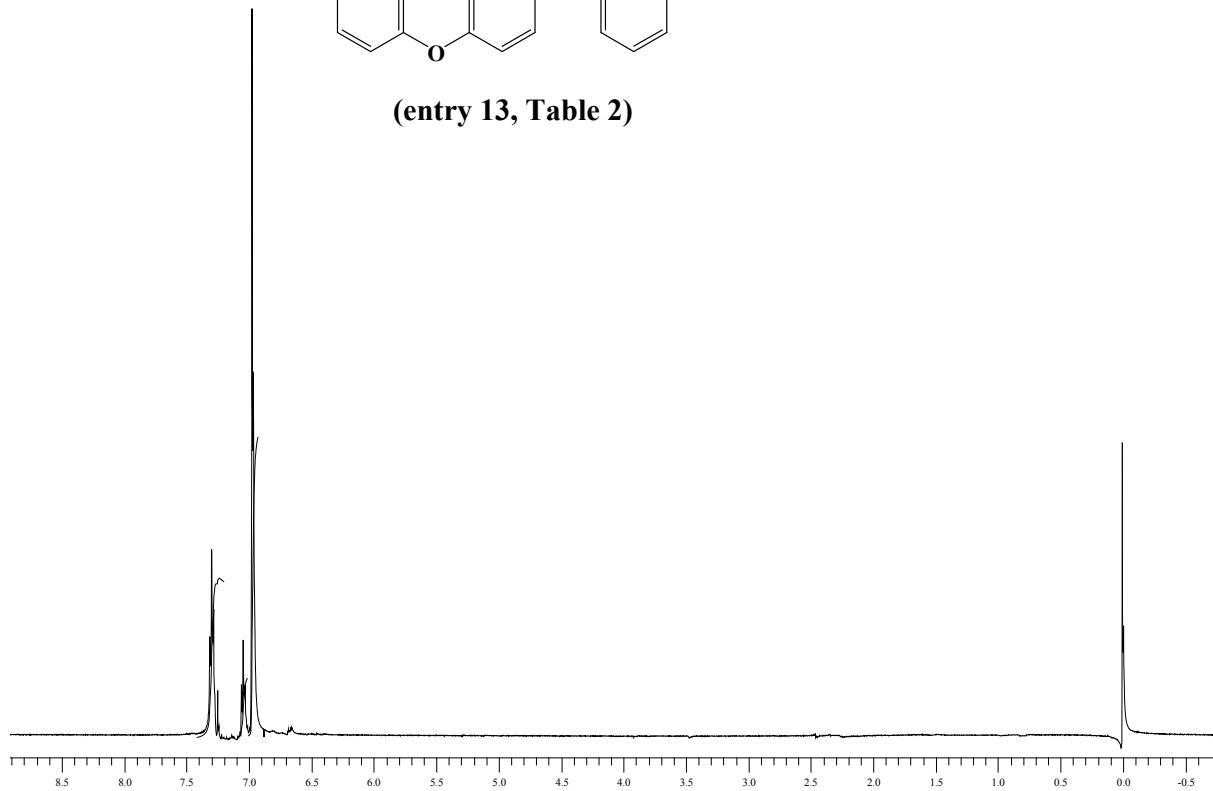

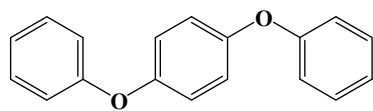

(entry 13, Table 2)

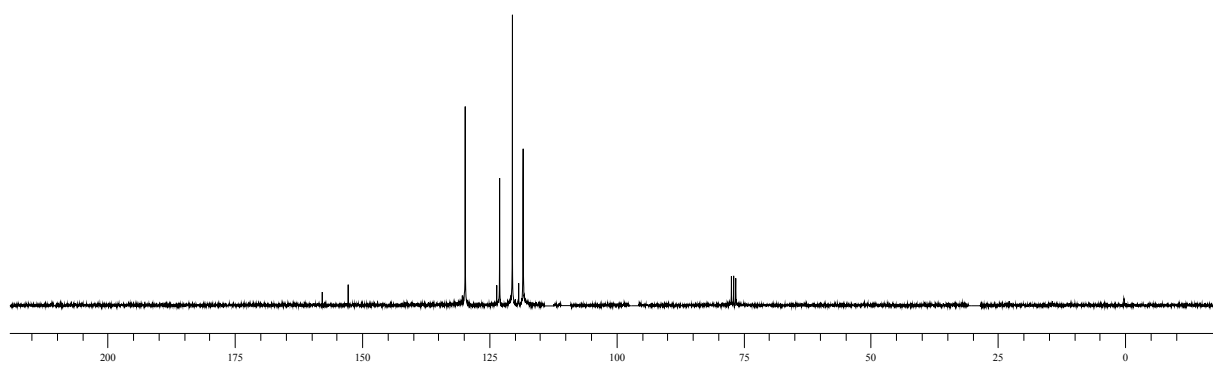

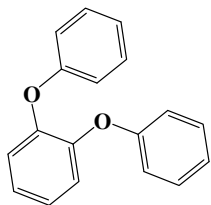

(entry 14, Table 2)

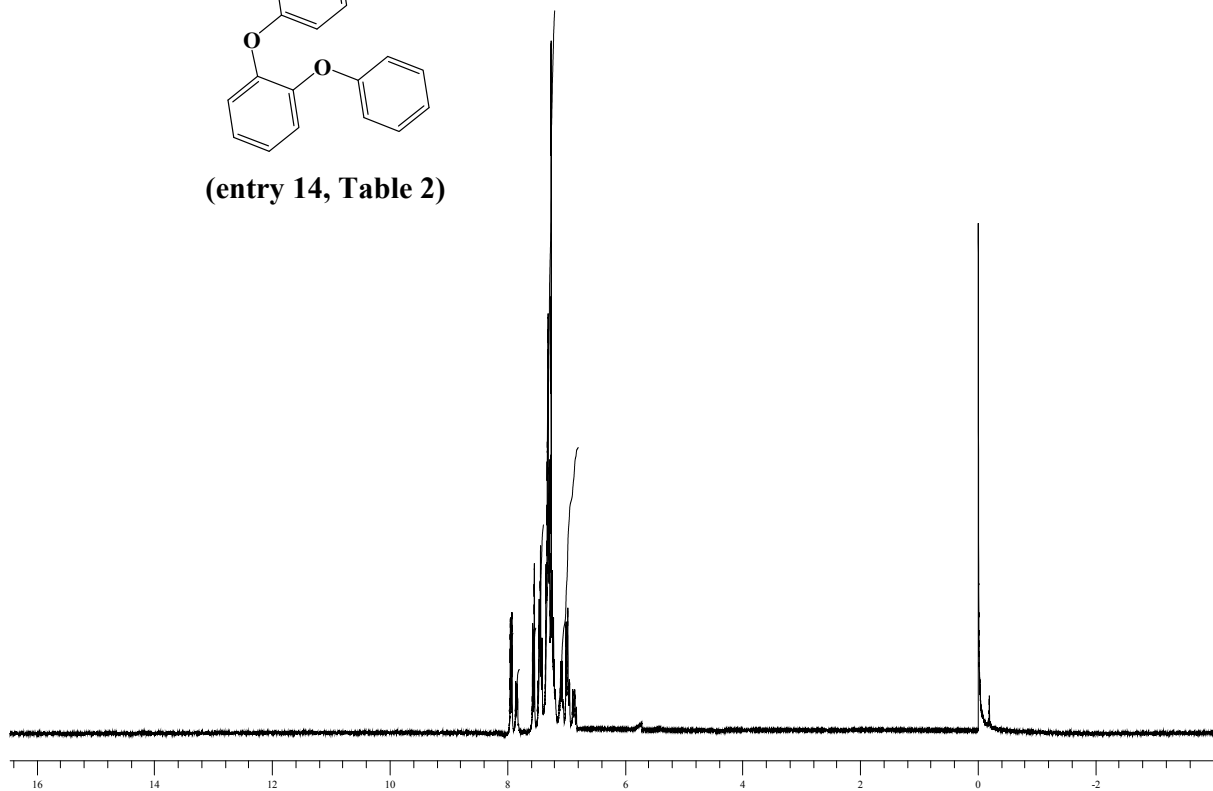

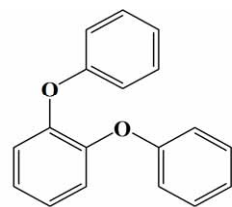

**(entry 14, Table 2)**

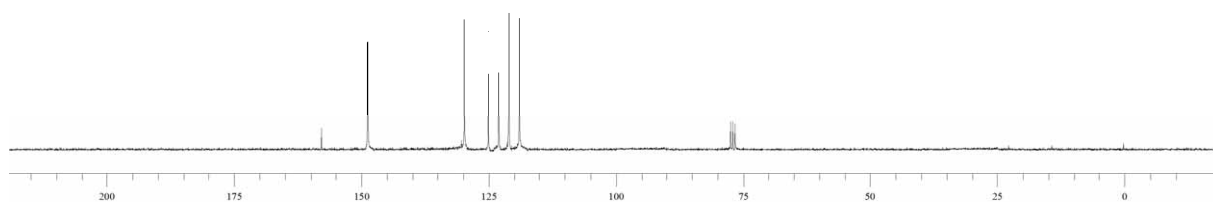

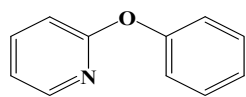

(entry 15, Table 2)

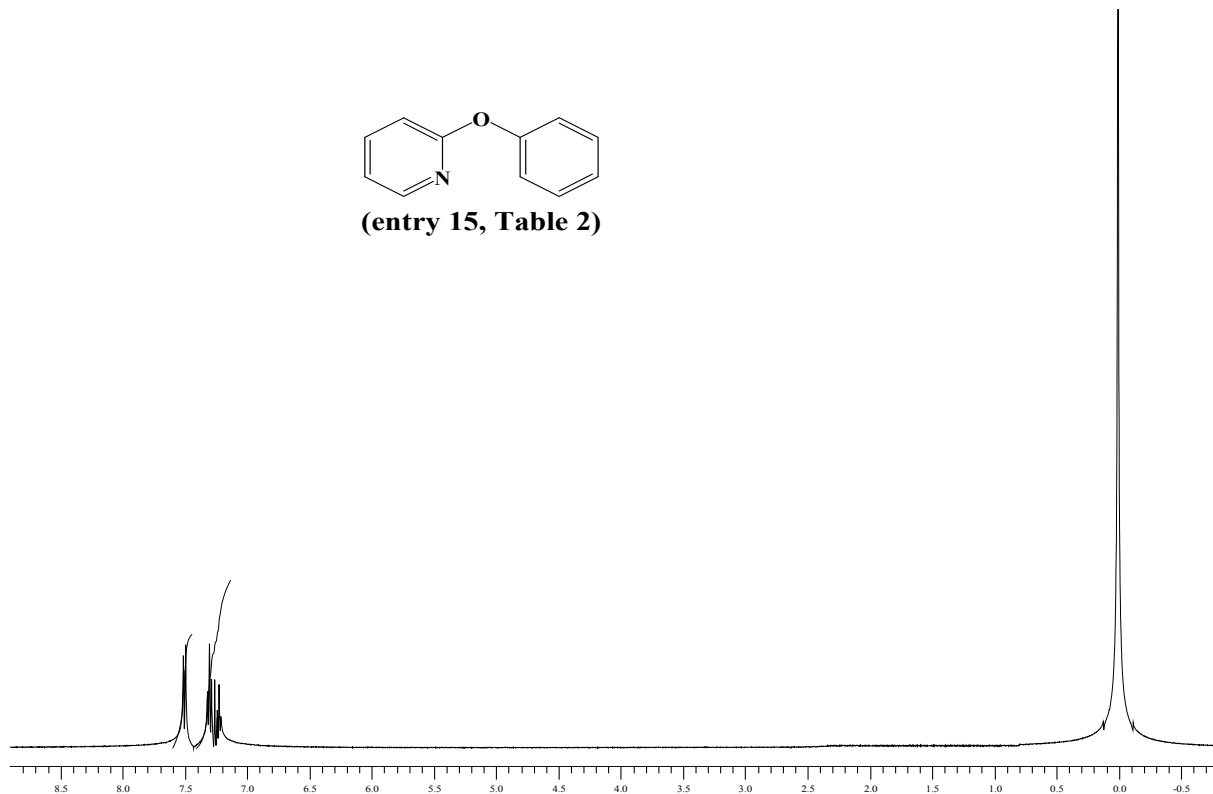



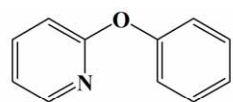

**(entry 15, Table 2)**

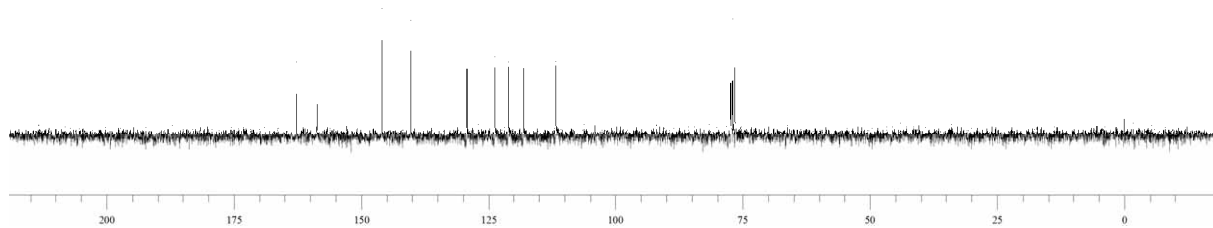

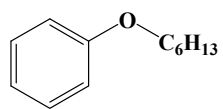

**(entry 16, Table 2)**

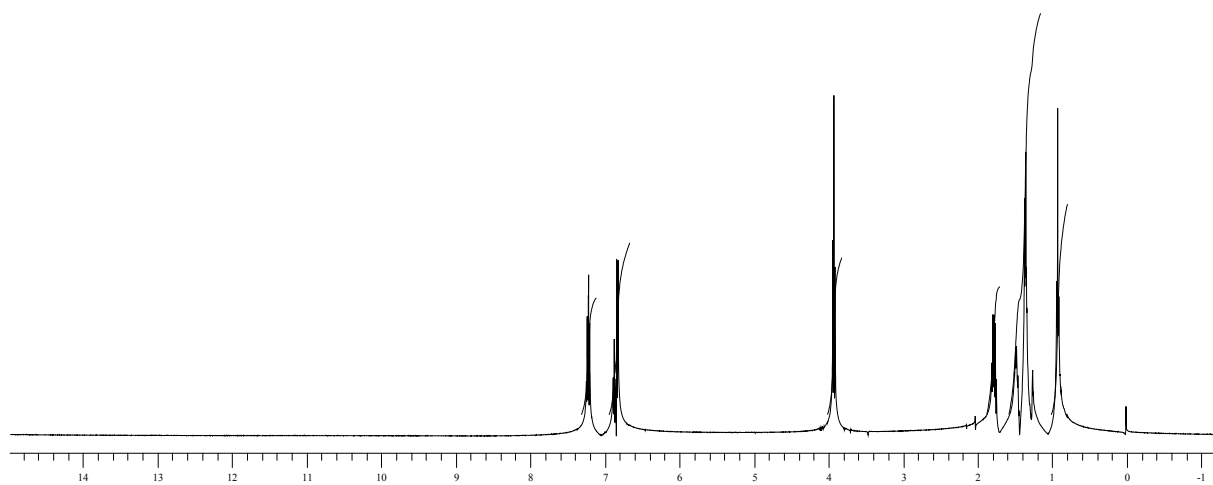

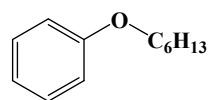

**(entry 16, Table 2)**

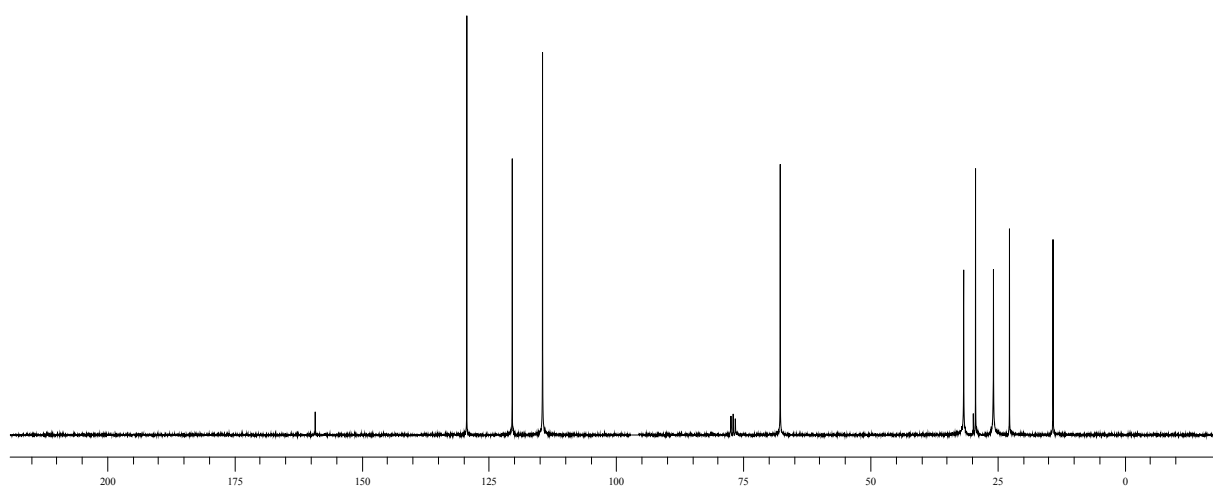

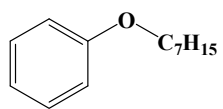

(entry 17, Table 2)

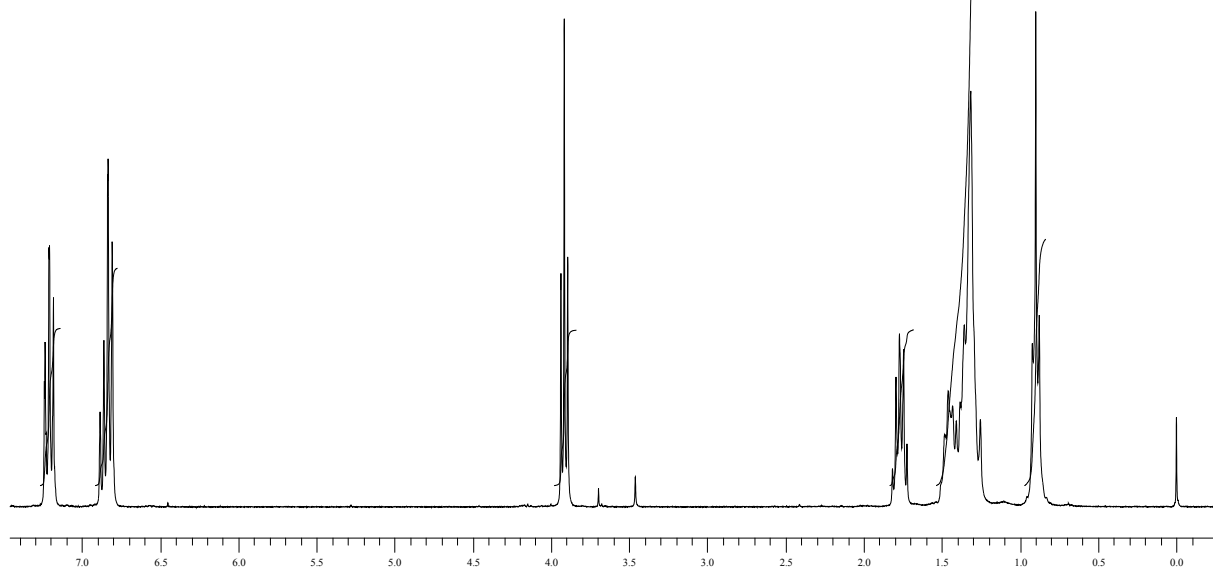

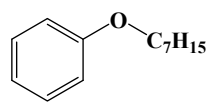

(entry 17, Table 2)

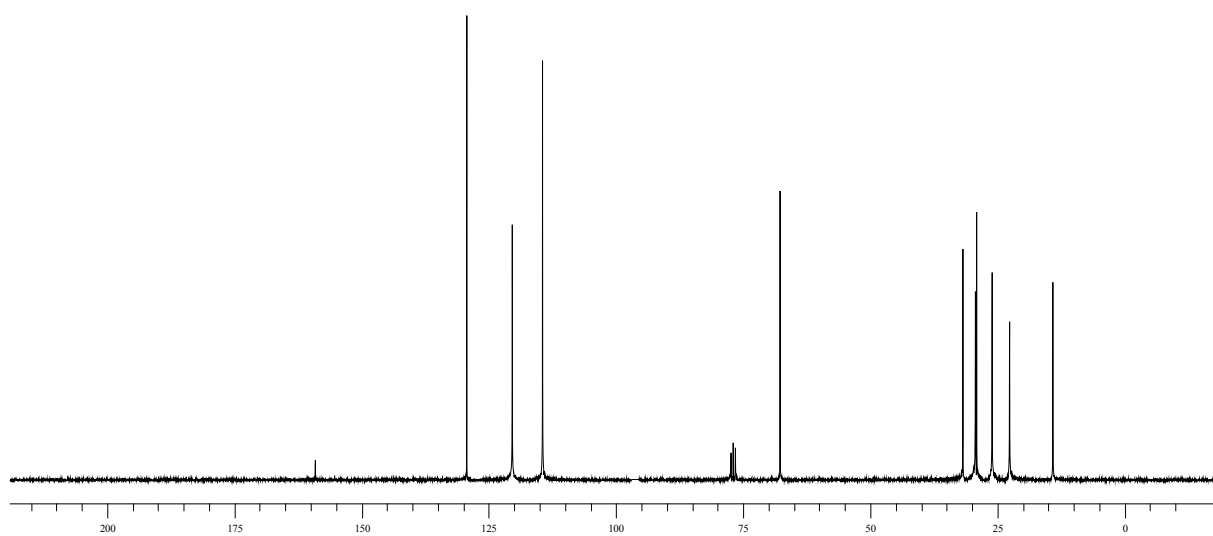

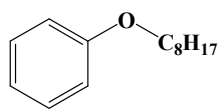

(entry 18, Table 2)

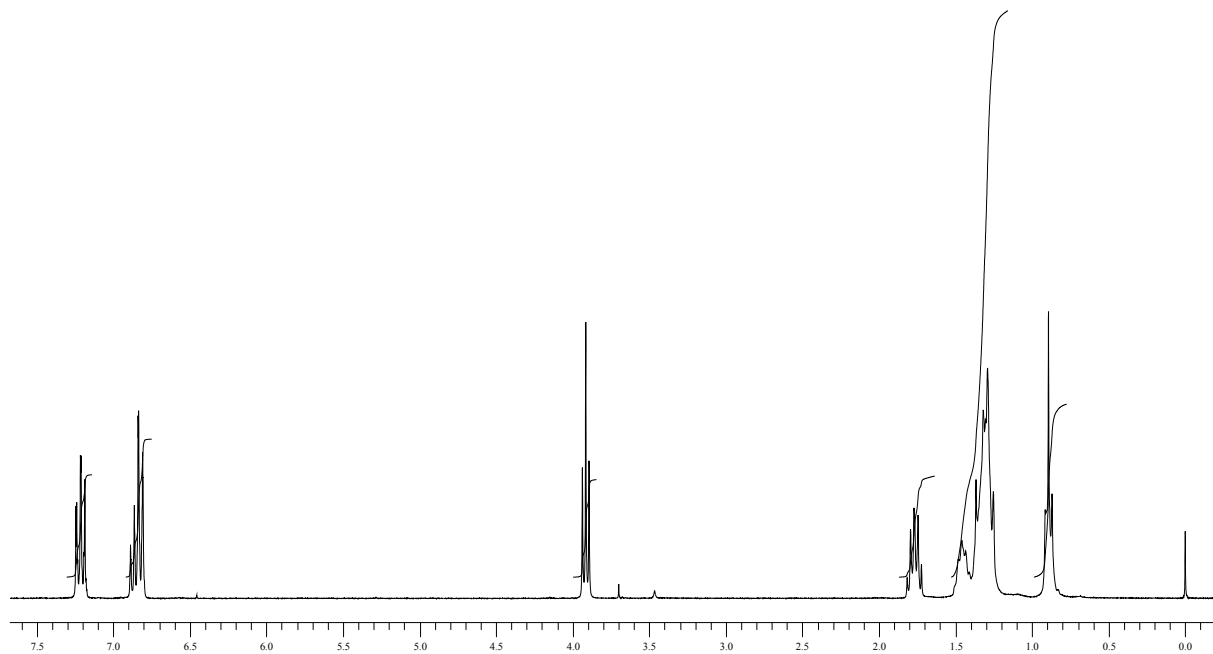

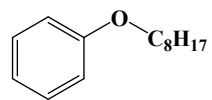

(entry 18, Table 2)

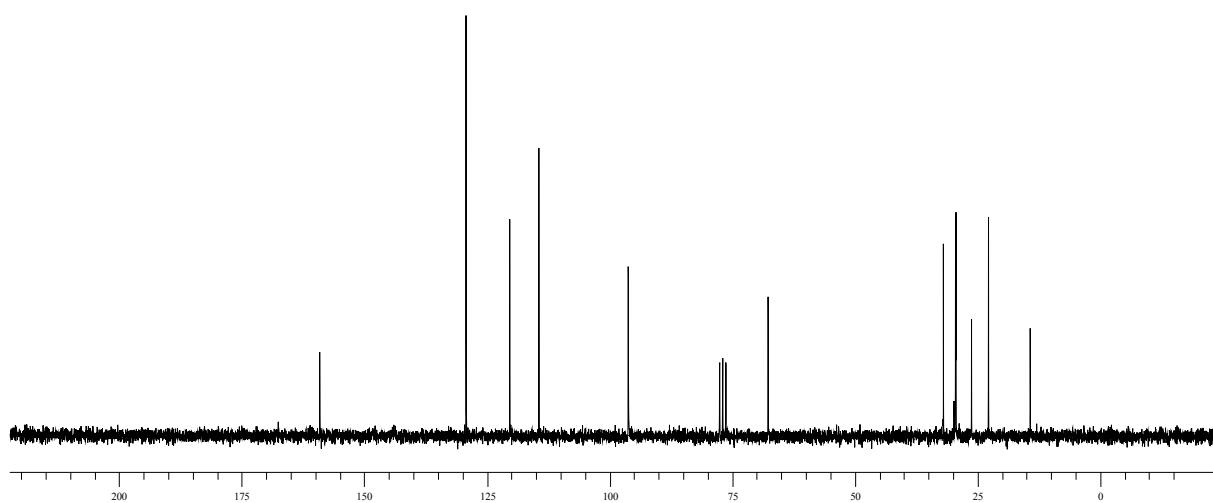

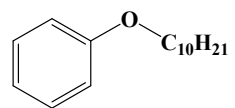

(entry 19, Table 2)

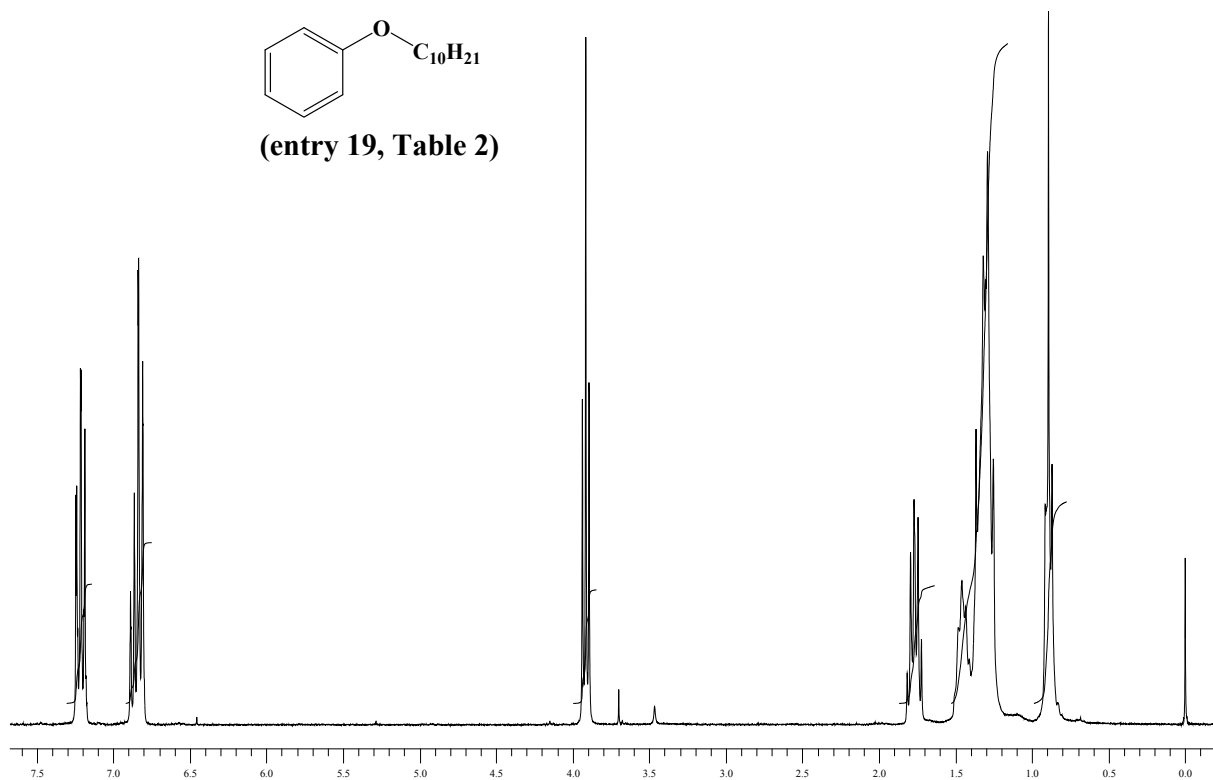



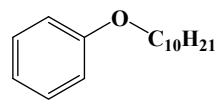

(entry 19, Table 2)

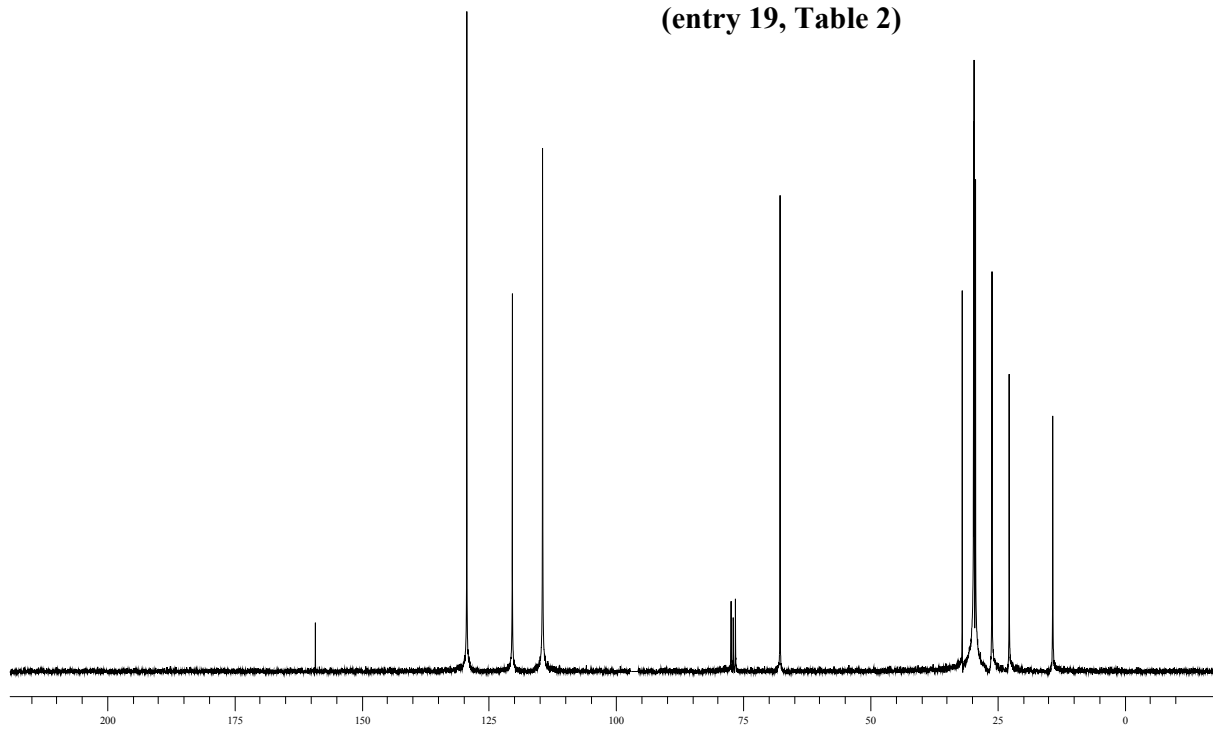

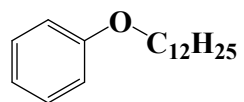

(entry 20, Table 2)

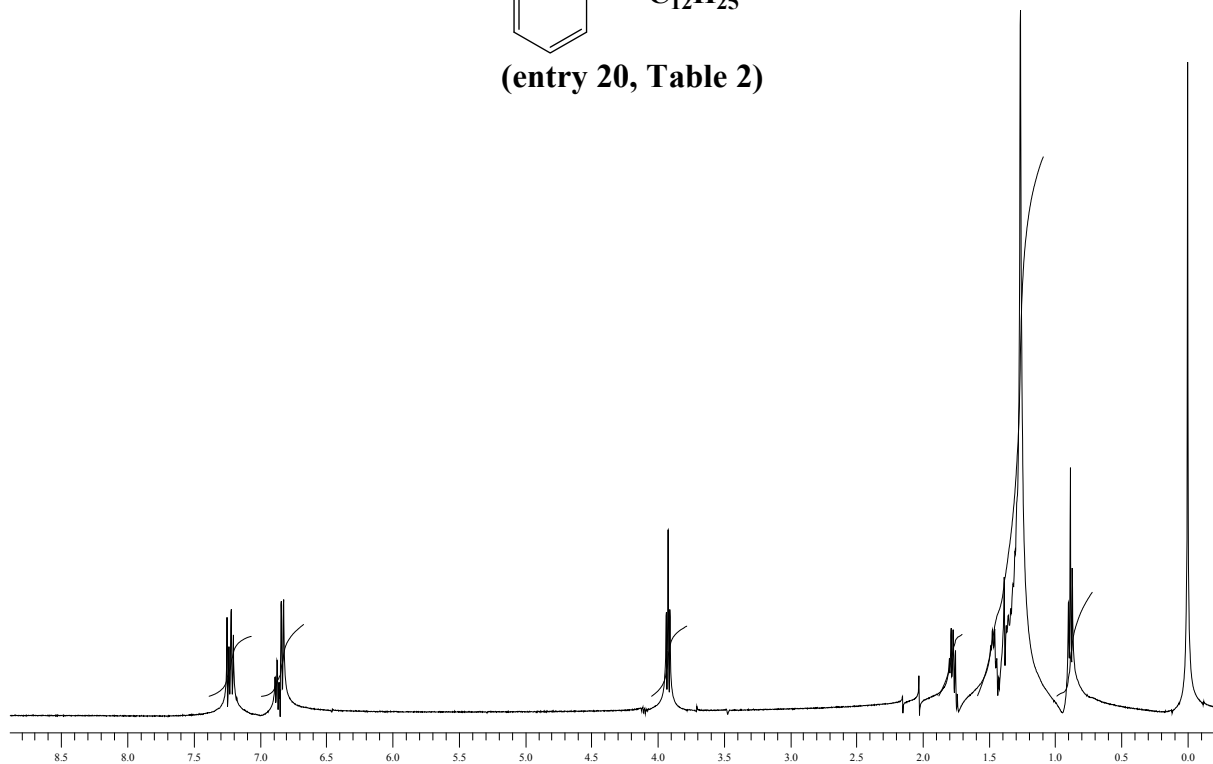

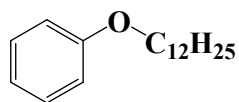

**(entry 20, Table 2)**

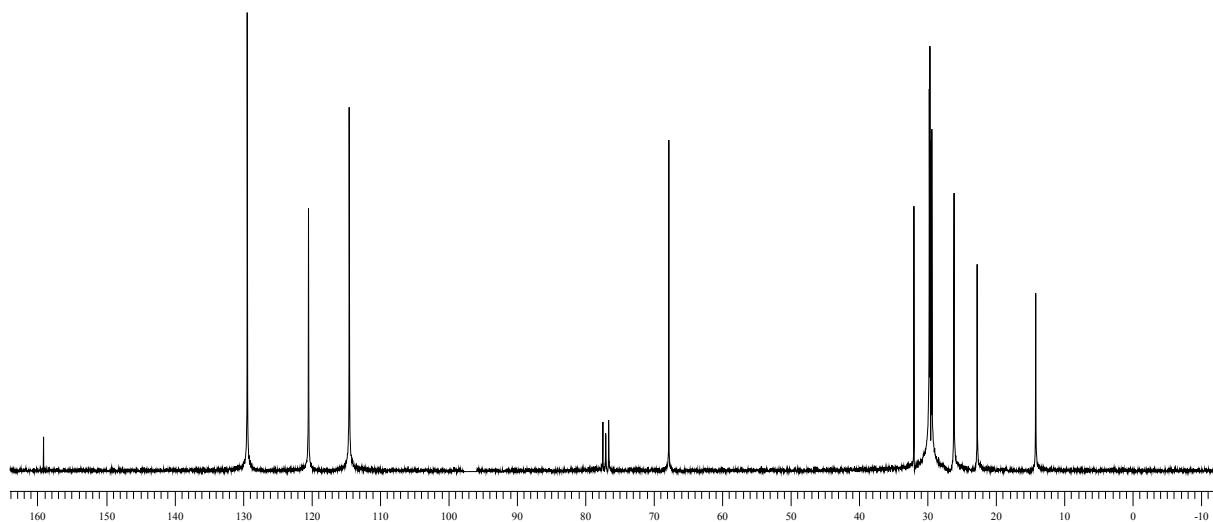

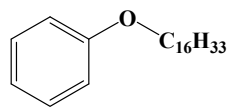

(entry 21, Table 2)

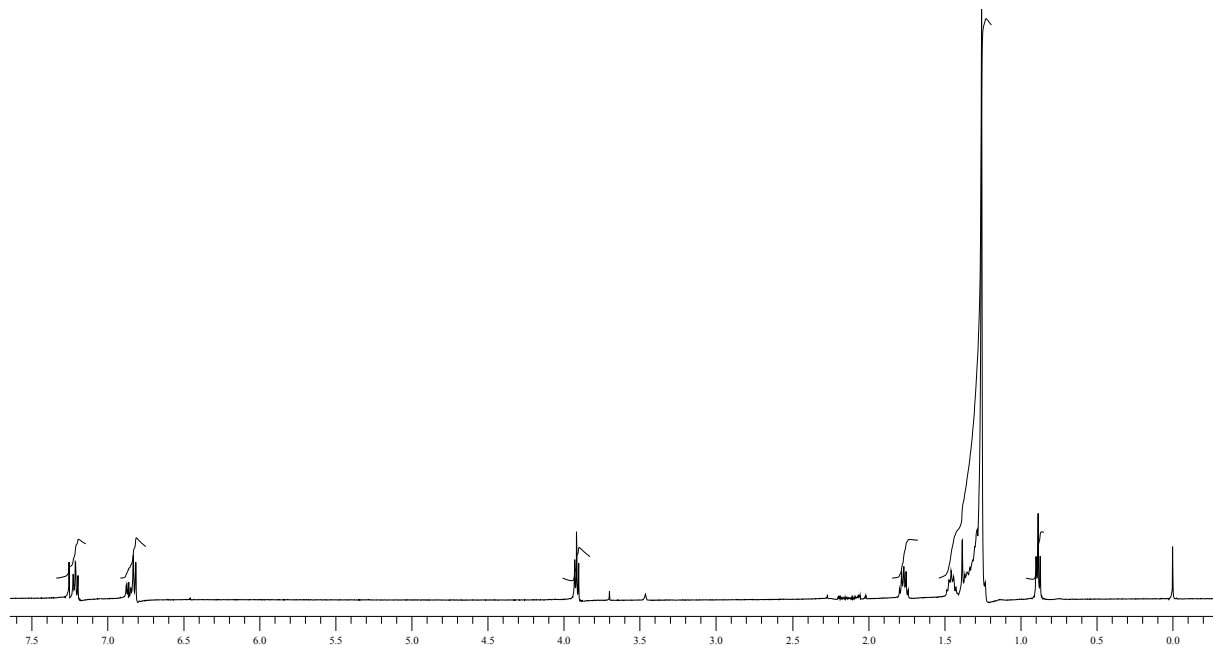

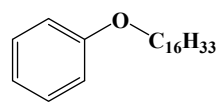

(entry 21, Table 2)

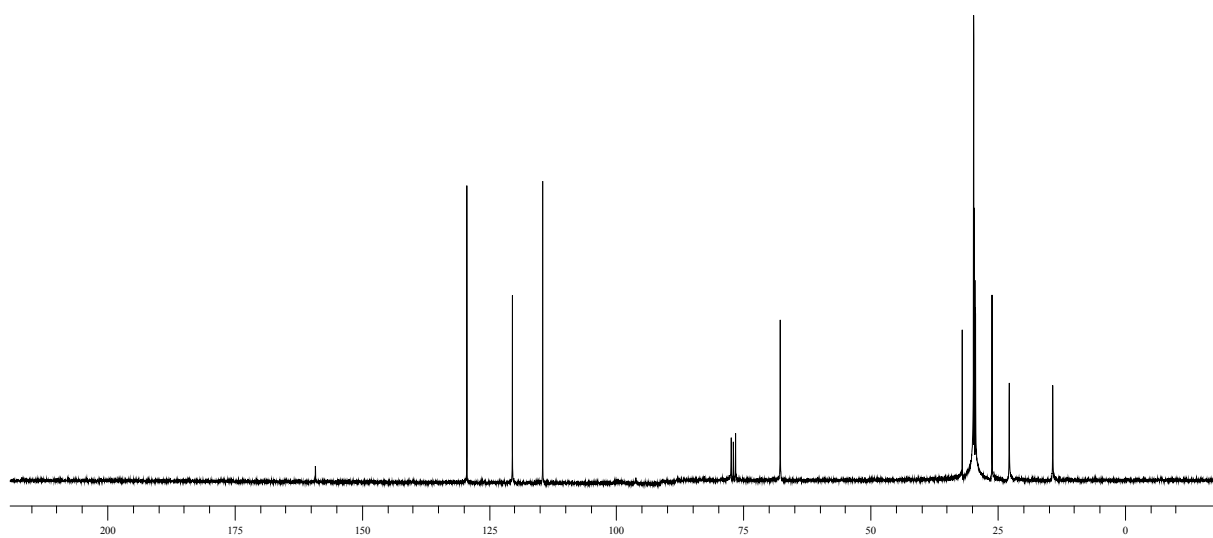

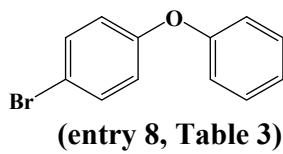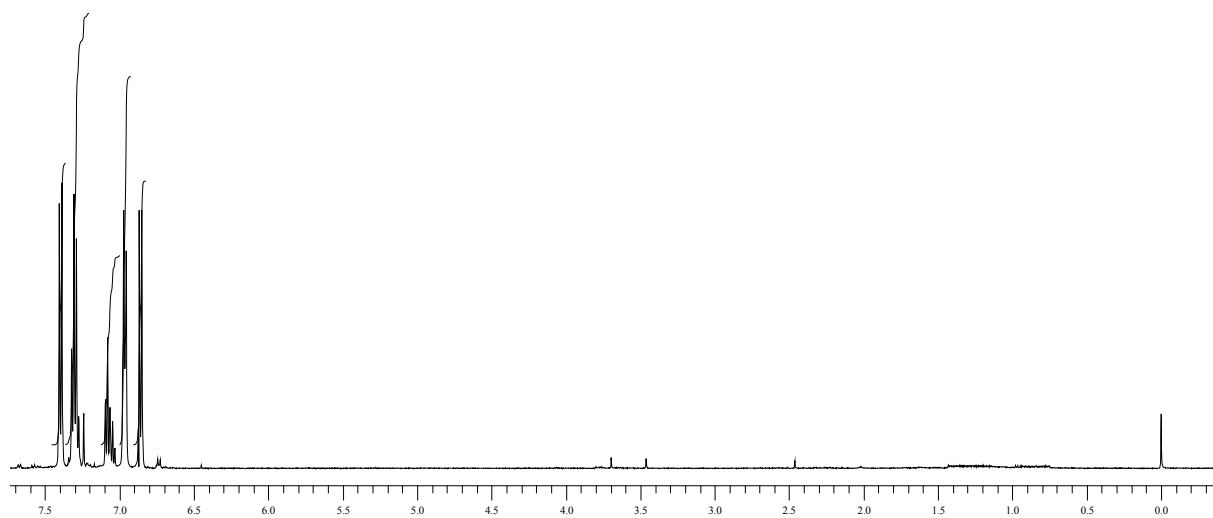

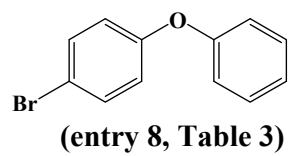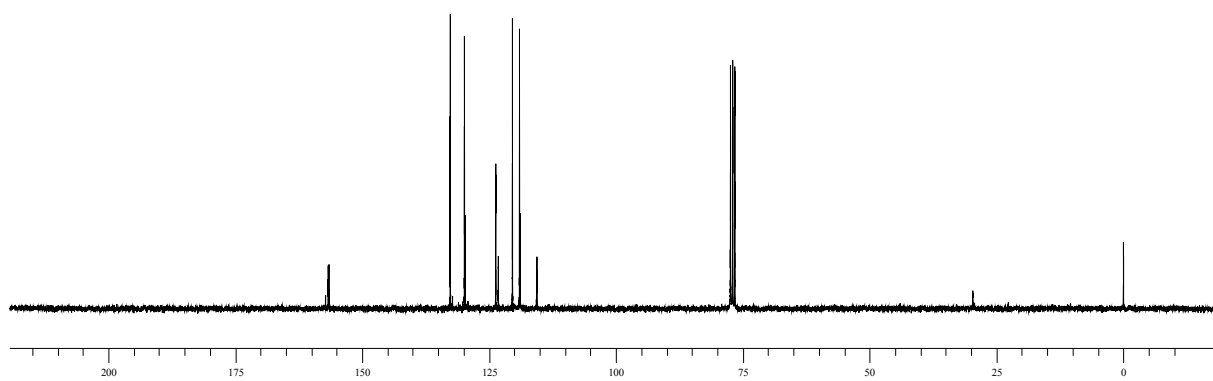

Supplement: c1ob05411b.pdf [file c1ob05411b.pdf]
